# Supplementary material for: Removal of anionic dyes from an aqueous solution by a magnetic cationic adsorbent modified with DMDAAC
Source: Royal Society of Chemistry journal article supplement (doi:10.1039/c8nj00635k), 2018-01-01
Supplement: c8nj00635k1.pdf [file c8nj00635k1.pdf]

Electronic Supplementary information (ESI) for New Journal of Chemistry

## Electronic supplementary information

Removal of anionic dyes by magnetic cationic adsorbent modified with DMDAAC  
from aqueous solution

Junjie Chen,<sup>a</sup> Hongling Chen<sup>\*a</sup>

*a. State Key Laboratory of Materials-Oriented Chemical Engineering, College of Chemical Engineering, Nanjing Tech University, Nanjing 210009, China.*

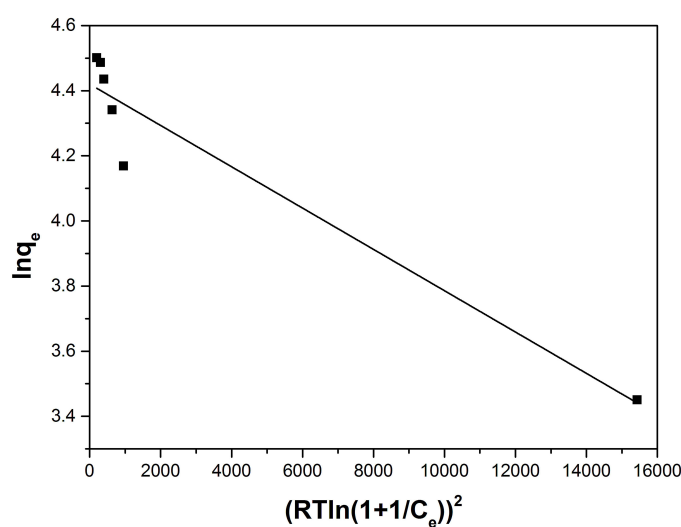

Fig. S1 The Dubinin–Radushkevich model plot for adsorption of methyl blue.

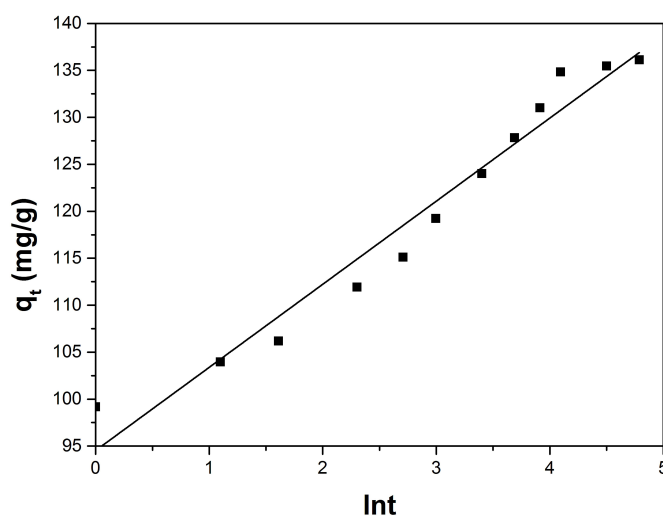

Fig. S2 The Elovich model plot for adsorption of methyl blue.
